# Supplementary material for: Dataset for Genome Sequencing and De Novo Assembly of the Candidate Phyla Radiation in Supragingival Plaque
Source: Can J Infect Dis Med Microbiol. 2022 Mar 19;2022:4899824. doi: 10.1155/2022/4899824 (PMC8957474; doi:10.1155/2022/4899824)
Supplement: Supplementary Materials — Human subject metadata: metadata for human subjects used in this analysis. [file 4899824.f1.txt]

Legend
Human subject metadata. Metadata for human subject used in this analysis.
SubjectID	FamilyID	center	age (months)	age (years)	Sex	zygosity	desug	devarfd	demuchfd	dcsugcfr	hcclap	heabmo	heab	obthbr	obbrcomag	obbrfrq	obtbrush	obtpast	obtpasty	obrins	obpasamt	Caries_treated	Caries_enam	Caries_dent
1057.2	1057	MCRI	76	6.3	M	DZ	sug_nvr	vartyfd_4	muchfd_4	sugcfr_nvr	cleft_no	abmom_no	ab_no	brsh_yes	brshagerng_2	brshfreq_2	tthbrsh_yes	tthpst_yes	tthpstTyp_chldF	rinse_spitrinse		YES	NO	NO
1059.1	1059	MCRI	66	5.5	M	DZ	sug_smt	vartyfd_3	muchfd_2	sugcfr_nvr	cleft_no	abmom_no	ab_no	brsh_yes	brshagerng_4	brshfreq_1	tthbrsh_yes	tthpst_yes	tthpstTyp_chldF	rinse_spitrinse		NO	NO	NO
1104.1	1104	MCRI	67	5.6	M	MZ	sug_nvr	vartyfd_3	muchfd_4	sugcfr_nvr	cleft_no	abmom_no	ab_dnr	brsh_yes	brshagerng_2	brshfreq_1	tthbrsh_yes	tthpst_yes	tthpstTyp_chldF	rinse_spitrinse	thtpstamt_pea	NO	NO	NO
1104.2	1104	MCRI	67	5.6	M	MZ	sug_nvr	vartyfd_3	muchfd_4	sugcfr_nvr	cleft_no	abmom_no	ab_dnr	brsh_yes	brshagerng_2	brshfreq_1	tthbrsh_yes	tthpst_yes	tthpstTyp_chldF	rinse_spitrinse	thtpstamt_pea	NO	NO	NO
2018.2	2018	MCRI	84	7	F	DZ	sug_nvr	vartyfd_5	muchfd_3	sugcfr_nvr	cleft_no	abmom_yes	ab_no	brsh_yes	brshagerng_3	brshfreq_2	tthbrsh_yes	tthpst_yes	tthpstTyp_chldF	rinse_spitrinse	thtpstamt_pea	NO	NO	NO
2019.1	2019	MCRI	67	5.6	M	MZ	sug_nvr	vartyfd_4	muchfd_4	sugcfr_nvr	cleft_no	abmom_no	ab_no	brsh_yes	brshagerng_1	brshfreq_1	tthbrsh_yes	tthpst_yes	tthpstTyp_chldF	rinse_spitrinse	thtpstamt_pea	NO	NO	NO
2019.2	2019	MCRI	67	5.6	M	MZ	sug_nvr	vartyfd_4	muchfd_4	sugcfr_nvr	cleft_no	abmom_no	ab_yes	brsh_yes	brshagerng_1	brshfreq_1	tthbrsh_yes	tthpst_yes	tthpstTyp_chldF	rinse_spitrinse	thtpstamt_pea	NO	NO	NO
2038.1	2038	MCRI	75	6.3	M	DZ	sug_nvr	vartyfd_3	muchfd_2	sugcfr_nvr	cleft_no	abmom_no	ab_no	brsh_yes	brshagerng_2	brshfreq_1	tthbrsh_yes	tthpst_yes	tthpstTyp_chldF	rinse_spitrinse	thtpstamt_pea	NO	NO	NO
2038.2	2038	MCRI	75	6.3	F	DZ	sug_nvr	vartyfd_3	muchfd_2	sugcfr_nvr	cleft_no	abmom_no	ab_no	brsh_yes	brshagerng_2	brshfreq_1	tthbrsh_yes	tthpst_yes	tthpstTyp_chldF	rinse_spitrinse	thtpstamt_pea	NO	NO	NO
3025.1	3025	MCRI	78	6.5	M	MZ	sug_smt	vartyfd_2	muchfd_3	sugcfr_nvr	cleft_no	abmom_no	ab_no	brsh_yes	brshagerng_3	brshfreq_1	tthbrsh_yes	tthpst_yes	tthpstTyp_adltF	rinse_spitrinse	thtpstamt_pea	NO	NO	NO
3025.2	3025	MCRI	78	6.5	M	MZ	sug_smt	vartyfd_2	muchfd_3	sugcfr_nvr	cleft_no	abmom_no	ab_no	brsh_yes	brshagerng_3	brshfreq_1	tthbrsh_yes	tthpst_yes	tthpstTyp_adltF	rinse_spitrinse	thtpstamt_pea	NO	NO	NO
A-1501-03.A	A-1501-03	CBRG	106	8.8	M	DZ	sug_smt	vartyfd_2	muchfd_1		cleft_no	abmom_dnr	ab_no	brsh_yes	brshagerng_2	brshfreq_1	tthbrsh_yes	tthpst_yes	tthpstTyp_adltF	rinse_spit	thtpstamt_pea	NO	NO	NO
A-1501-03.B	A-1501-03	CBRG	106	8.8	F	DZ	sug_smt	vartyfd_2	muchfd_1		cleft_no	abmom_dnr	ab_no	brsh_yes	brshagerng_2	brshfreq_1	tthbrsh_yes	tthpst_yes	tthpstTyp_adltF	rinse_spit	thtpstamt_pea	NO	NO	NO
A-1501-04.A	A-1501-04	CBRG	79	6.6	M	MZ	sug_nvr	vartyfd_4	muchfd_3		cleft_no	abmom_no	ab_yes	brsh_yes	brshagerng_3	brshfreq_1	tthbrsh_yes	tthpst_yes	tthpstTyp_chldF	rinse_spit	thtpstamt_pea	NO	NO	NO
A-1501-04.B	A-1501-04	CBRG	79	6.6	M	MZ	sug_nvr	vartyfd_4	muchfd_3		cleft_no	abmom_no	ab_yes	brsh_yes	brshagerng_3	brshfreq_1	tthbrsh_yes	tthpst_yes	tthpstTyp_chldF	rinse_spit	thtpstamt_pea	NO	NO	NO
A-1501-31.A	A-1501-31	CBRG	102	8.5	M	MZ	sug_smt							brsh_yes		brshfreq_2		tthpst_yes	tthpstTyp_adlt		thtpstamt_pea	NO	NO	NO
A-1501-31.B	A-1501-31	CBRG	102	8.5	M	MZ	sug_smt							brsh_yes		brshfreq_2		tthpst_yes	tthpstTyp_adlt		thtpstamt_pea	NO	NO	NO
A-1504-94.B	A-1504-94	CBRG	115	9.6	F	MZ	sug_nvr							brsh_yes	brshagerng_5	brshfreq_1		tthpst_yes	tthpstTyp_adltF		thtpstamt_pea	YES	NO	NO
A-1504-97.B	A-1504-97	CBRG	99	8.3	M	MZ	sug_nvr	vartyfd_4	muchfd_3		cleft_no	abmom_no	ab_no	brsh_yes		brshfreq_1	tthbrsh_yes	tthpst_yes	tthpstTyp_chldF	rinse_spit	thtpstamt_pea	YES	NO	NO
A-1505-99.B	A-1505-99	CBRG	107	8.9	F	MZ	sug_nvr	vartyfd_3	muchfd_3		cleft_no	abmom_no	ab_no	brsh_yes	brshagerng_2	brshfreq_1	tthbrsh_yes	tthpst_yes	tthpstTyp_chldF	rinse_spit	thtpstamt_pea	YES	NO	NO
C-1504-93.A	C-1504-93	CBRG	98	8.2	F	MZ	sug_smt							brsh_yes	brshagerng_3	brshfreq_2		tthpst_yes	tthpstTyp_chldF		thtpstamt_pea	NO	NO	NO
C-1504-93.B	C-1504-93	CBRG	98	8.2	F	MZ	sug_smt							brsh_yes	brshagerng_3	brshfreq_2		tthpst_yes	tthpstTyp_chldF		thtpstamt_pea	NO	NO	NO
M-1506-106.B	M-1506-106	CBRG	106	8.8	F	MZ	sug_nvr	vartyfd_3	muchfd_4		cleft_no	abmom_no	ab_no	brsh_yes			tthbrsh_yes	tthpst_yes				NO	NO	NO
M-1506-163.B	M-1506-163	CBRG	115	9.6	M	DZ	sug_nvr	vartyfd_1	muchfd_2		cleft_no	abmom_yes	ab_yes	brsh_yes	brshagerng_2	brshfreq_1	tthbrsh_yes	tthpst_yes	tthpstTyp_chldF	rinse_spitrinse	thtpstamt_smr	NO	NO	NO
M-1507-117.A	M-1507-117	CBRG	125	10.4	F	MZ	sug_nvr	vartyfd_3	muchfd_3		cleft_no	abmom_no	ab_no	brsh_yes		brshfreq_1	tthbrsh_yes	tthpst_yes	tthpstTyp_adltF	rinse_spit	thtpstamt_full	YES	NO	NO
M-1507-118.B	M-1507-118	CBRG	118	9.8	M	DZ	sug_smt	vartyfd_5	muchfd_5		cleft_no	abmom_yes	ab_yes	brsh_yes	brshagerng_4	brshfreq_1	tthbrsh_yes	tthpst_yes	tthpstTyp_chldF	rinse_spitrinse	thtpstamt_pea	YES	NO	NO
M-1507-130.A	M-1507-130	CBRG	93	7.8	M	MZ	sug_nvr	vartyfd_3	muchfd_3		cleft_no	abmom_dnr	ab_no	brsh_yes	brshagerng_2	brshfreq_1	tthbrsh_yes	tthpst_yes	tthpstTyp_chldF	rinse_spitrinse	thtpstamt_pea	NO	NO	NO
M-1507-134.A	M-1507-134	CBRG	129	10.8	F	DZ	sug_nvr				cleft_no	abmom_no	ab_no	brsh_yes	brshagerng_3	brshfreq_2		tthpst_yes	tthpstTyp_chldF		thtpstamt_full	NO	NO	NO
M-1507-138.B	M-1507-138	CBRG	122	10.2	F	DZ								brsh_yes		brshfreq_2		tthpst_yes	tthpstTyp_chldF		thtpstamt_smr	NO	NO	NO
M-1507-143.A	M-1507-143	CBRG	104	8.7	F	MZ	sug_smt	vartyfd_3	muchfd_4		cleft_no	abmom_dnr	ab_no	brsh_yes	brshagerng_4	brshfreq_1	tthbrsh_yes	tthpst_yes	tthpstTyp_chldF	rinse_spitrinse	thtpstamt_pea	NO	NO	NO
M-1507-143.B	M-1507-143	CBRG	104	8.7	F	MZ	sug_smt	vartyfd_3	muchfd_4		cleft_no	abmom_dnr	ab_no	brsh_yes	brshagerng_4	brshfreq_1	tthbrsh_yes	tthpst_yes	tthpstTyp_chldF	rinse_spitrinse	thtpstamt_pea	NO	NO	NO
M-1507-144.A	M-1507-144	CBRG	121	10.1	F	MZ	sug_nvr	vartyfd_4	muchfd_3					brsh_yes		brshfreq_1	tthbrsh_yes	tthpst_yes	tthpstTyp_adltF	rinse_spit	thtpstamt_pea	NO	NO	NO
M-1507-147.A	M-1507-147	CBRG	110	9.2	F	DZ		vartyfd_4	muchfd_4		cleft_no	abmom_dnr	ab_no	brsh_yes	brshagerng_4	brshfreq_2	tthbrsh_yes	tthpst_yes	tthpstTyp_chldF	rinse_spitrinse	thtpstamt_full	YES	NO	NO
M-1507-156.A	M-1507-156	CBRG	106	8.8	F	MZ	sug_nvr	vartyfd_3	muchfd_3		cleft_no	abmom_dnr	ab_no	brsh_yes	brshagerng_4	brshfreq_1	tthbrsh_yes	tthpst_yes	tthpstTyp_chldF	rinse_spit	thtpstamt_pea	NO	NO	NO
M-1507-156.B	M-1507-156	CBRG	106	8.8	F	MZ	sug_nvr	vartyfd_3	muchfd_3		cleft_no	abmom_dnr	ab_no	brsh_yes	brshagerng_4	brshfreq_1	tthbrsh_yes	tthpst_yes	tthpstTyp_chldF	rinse_spit	thtpstamt_pea	NO	NO	NO
S-1409-53.A	S-1409-53	CBRG	98	8.2	M	DZ	sug_alw	vartyfd_1	muchfd_5		cleft_no	abmom_yes	ab_dnr	brsh_yes	brshagerng_3	brshfreq_2	tthbrsh_yes	tthpst_yes	tthpstTyp_chldF	rinse_spitrinse	thtpstamt_full	NO	NO	NO
S-1410-81.B	S-1410-81	CBRG	83	6.9	F	MZ	sug_nvr	vartyfd_3	muchfd_3		cleft_no	abmom_no	ab_no	brsh_yes		brshfreq_1	tthbrsh_yes	tthpst_yes	tthpstTyp_chldF	rinse_spit	thtpstamt_pea	NO	NO	NO
S-1504-90.A	S-1504-90	CBRG	109	9.1	M	MZ	sug_nvr	vartyfd_4	muchfd_3		cleft_no	abmom_no	ab_no	brsh_yes	brshagerng_3	brshfreq_1	tthbrsh_yes	tthpst_yes	tthpstTyp_adltF	rinse_spit	thtpstamt_full	NO	NO	NO
1082.2	1082	MCRI	72	6	F	MZ	sug_nvr	vartyfd_3	muchfd_3	sugcfr_nvr	cleft_no	abmom_yes	ab_yes	brsh_yes	brshagerng_2	brshfreq_1	tthbrsh_yes	tthpst_yes	tthpstTyp_chldF	rinse_spit	thtpstamt_full	NO	YES	NO
1086.2	1086	MCRI	80	6.7	M	DZ	sug_nvr	vartyfd_2	muchfd_3	sugcfr_smt	cleft_no	abmom_no	ab_no	brsh_yes	brshagerng_4	brshfreq_1	tthbrsh_yes	tthpst_yes	tthpstTyp_chldF	rinse_spitrinse	thtpstamt_pea	YES	YES	NO
1089.1	1089	MCRI	76	6.3	M	DZ	sug_nvr	vartyfd_3	muchfd_3	sugcfr_nvr	cleft_no	abmom_no	ab_no	brsh_yes	brshagerng_5	brshfreq_1	tthbrsh_yes	tthpst_yes	tthpstTyp_chldF	rinse_spitrinse	thtpstamt_pea	NO	YES	NO
1089.2	1089	MCRI	76	6.3	M	DZ	sug_nvr	vartyfd_3	muchfd_3	sugcfr_nvr	cleft_no	abmom_no	ab_no	brsh_yes	brshagerng_4	brshfreq_1	tthbrsh_yes	tthpst_yes	tthpstTyp_chldF	rinse_spitrinse	thtpstamt_pea	NO	YES	NO
2017.1	2017	MCRI	78	6.5	M	DZ	sug_smt	vartyfd_4	muchfd_4	sugcfr_nvr	cleft_no	abmom_yes	ab_dnr	brsh_yes	brshagerng_3	brshfreq_3	tthbrsh_yes	tthpst_yes	tthpstTyp_chldF	rinse_spitrinse	thtpstamt_full	NO	YES	NO
2017.2	2017	MCRI	78	6.5	F	DZ	sug_smt	vartyfd_4	muchfd_4	sugcfr_nvr	cleft_no	abmom_yes	ab_dnr	brsh_yes	brshagerng_3	brshfreq_3	tthbrsh_yes	tthpst_yes	tthpstTyp_chldF	rinse_spitrinse	thtpstamt_full	NO	YES	NO
3006.1	3006	MCRI	80	6.7	M	DZ																NO	YES	NO
3042.2	3042	MCRI	78	6.5	F	MZ	sug_smt	vartyfd_3	muchfd_2	sugcfr_smt	cleft_no	abmom_dnr	ab_no	brsh_yes	brshagerng_2	brshfreq_2	tthbrsh_yes	tthpst_yes	tthpstTyp_chldF	rinse_spitrinse	thtpstamt_smr	NO	YES	NO
A-1504-37.A	A-1504-37	CBRG	98	8.2	F	DZ	sug_nvr				cleft_no	abmom_dnr	ab_no	brsh_yes	brshagerng_2	brshfreq_1	tthbrsh_yes	tthpst_yes	tthpstTyp_adltF	rinse_spitrinse	thtpstamt_full	YES	YES	NO
A-1504-37.B	A-1504-37	CBRG	98	8.2	F	DZ	sug_nvr				cleft_no	abmom_dnr	ab_no	brsh_yes	brshagerng_2	brshfreq_1	tthbrsh_yes	tthpst_yes	tthpstTyp_adltF	rinse_spit	thtpstamt_full	YES	YES	NO
A-1504-94.A	A-1504-94	CBRG	115	9.6	F	MZ	sug_nvr							brsh_yes	brshagerng_5	brshfreq_1		tthpst_yes	tthpstTyp_adltF		thtpstamt_pea	YES	YES	NO
A-1504-96.B	A-1504-96	CBRG	66	5.5	F	MZ	sug_nvr	vartyfd_3	muchfd_3		cleft_no	abmom_yes	ab_no	brsh_yes	brshagerng_4	brshfreq_1	tthbrsh_yes	tthpst_yes	tthpstTyp_chldF	rinse_spit	thtpstamt_full	NO	YES	NO
A-1504-97.A	A-1504-97	CBRG	99	8.3	M	MZ	sug_nvr	vartyfd_4	muchfd_3		cleft_no	abmom_no	ab_no	brsh_yes		brshfreq_1	tthbrsh_yes	tthpst_yes	tthpstTyp_chldF	rinse_spit	thtpstamt_pea	YES	YES	NO
M-1506-163.A	M-1506-163	CBRG	115	9.6	F	DZ	sug_nvr	vartyfd_1	muchfd_2		cleft_no	abmom_yes	ab_yes	brsh_yes	brshagerng_2	brshfreq_1	tthbrsh_yes	tthpst_yes	tthpstTyp_chldF	rinse_spitrinse	thtpstamt_smr	NO	YES	NO
M-1507-117.B	M-1507-117	CBRG	125	10.4	F	MZ	sug_nvr	vartyfd_3	muchfd_3		cleft_no	abmom_no	ab_no	brsh_yes		brshfreq_1	tthbrsh_yes	tthpst_yes	tthpstTyp_adltF	rinse_spit	thtpstamt_full	NO	YES	NO
M-1507-130.B	M-1507-130	CBRG	93	7.8	M	MZ	sug_nvr	vartyfd_3	muchfd_3		cleft_no	abmom_dnr	ab_no	brsh_yes	brshagerng_2	brshfreq_1	tthbrsh_yes	tthpst_yes	tthpstTyp_chldF	rinse_spitrinse	thtpstamt_pea	YES	YES	NO
M-1507-133.A	M-1507-133	CBRG	100	8.3	F	MZ	sug_nvr	vartyfd_4	muchfd_4		cleft_no	abmom_no	ab_no	brsh_yes	brshagerng_2	brshfreq_1	tthbrsh_yes	tthpst_yes		rinse_spitrinse	thtpstamt_pea	NO	YES	NO
M-1507-144.B	M-1507-144	CBRG	121	10.1	F	MZ	sug_nvr	vartyfd_4	muchfd_3					brsh_yes		brshfreq_1	tthbrsh_yes	tthpst_yes	tthpstTyp_adltF	rinse_spit	thtpstamt_pea	NO	YES	NO
S-1410-79.A	S-1410-79	CBRG	100	8.3	M	MZ	sug_nvr	vartyfd_1	muchfd_2		cleft_no	abmom_yes	ab_yes	brsh_yes		brshfreq_2	tthbrsh_yes	tthpst_yes	tthpstTyp_adltF	rinse_spitrinse	thtpstamt_full	NO	YES	NO
S-1410-79.B	S-1410-79	CBRG	100	8.3	M	MZ	sug_nvr	vartyfd_1	muchfd_2		cleft_no	abmom_yes	ab_yes	brsh_yes		brshfreq_2	tthbrsh_yes	tthpst_yes	tthpstTyp_adltF	rinse_spitrinse	thtpstamt_full	NO	YES	NO
S-1410-81.A	S-1410-81	CBRG	83	6.9	F	MZ	sug_nvr	vartyfd_3	muchfd_3		cleft_no	abmom_no	ab_no	brsh_yes		brshfreq_1	tthbrsh_yes	tthpst_yes	tthpstTyp_chldF	rinse_spit	thtpstamt_pea	NO	YES	NO
S-1504-86.B	S-1504-86	CBRG	108	9	F	MZ	sug_nvr	vartyfd_2	muchfd_3		cleft_no	abmom_no	ab_no	brsh_yes		brshfreq_1	tthbrsh_yes	tthpst_yes	tthpstTyp_adltF	rinse_spitrinse	thtpstamt_pea	NO	YES	NO
S-1504-90.B	S-1504-90	CBRG	109	9.1	M	MZ	sug_nvr	vartyfd_4	muchfd_3		cleft_no	abmom_no	ab_no	brsh_yes	brshagerng_3	brshfreq_1	tthbrsh_yes	tthpst_yes	tthpstTyp_adltF	rinse_spit	thtpstamt_full	NO	YES	NO
1054.1	1054	MCRI	78	6.5	F	MZ	sug_alw	vartyfd_3	muchfd_3	sugcfr_nvr	cleft_no	abmom_no	ab_no	brsh_yes	brshagerng_6	brshfreq_1	tthbrsh_yes	tthpst_yes	tthpstTyp_adltF	rinse_spit		YES	YES	YES
1054.2	1054	MCRI	78	6.5	F	MZ	sug_alw	vartyfd_3	muchfd_3	sugcfr_nvr	cleft_no	abmom_no	ab_no	brsh_yes	brshagerng_6	brshfreq_1	tthbrsh_yes	tthpst_yes	tthpstTyp_adltF	rinse_spit		YES	YES	YES
1057.1	1057	MCRI	76	6.3	M	DZ	sug_nvr	vartyfd_4	muchfd_4	sugcfr_nvr	cleft_no	abmom_no	ab_no	brsh_yes	brshagerng_2	brshfreq_2	tthbrsh_yes	tthpst_yes	tthpstTyp_chldF	rinse_spitrinse		NO	YES	YES
1059.2	1059	MCRI	66	5.5	M	DZ	sug_smt	vartyfd_3	muchfd_2	sugcfr_nvr	cleft_no	abmom_no	ab_no	brsh_yes	brshagerng_4	brshfreq_1	tthbrsh_yes	tthpst_yes	tthpstTyp_chldF	rinse_spitrinse		NO	YES	YES
1082.1	1082	MCRI	72	6	F	MZ	sug_nvr	vartyfd_3	muchfd_3	sugcfr_nvr	cleft_no	abmom_yes	ab_yes	brsh_yes	brshagerng_2	brshfreq_1	tthbrsh_yes	tthpst_yes	tthpstTyp_chldF	rinse_spit	thtpstamt_full	NO	YES	YES
1086.1	1086	MCRI	80	6.7	F	DZ	sug_nvr	vartyfd_2	muchfd_3	sugcfr_smt	cleft_no	abmom_no	ab_no	brsh_yes	brshagerng_4	brshfreq_1	tthbrsh_yes	tthpst_yes	tthpstTyp_chldF	rinse_spitrinse	thtpstamt_pea	YES	YES	YES
2018.1	2018	MCRI	84	7	M	DZ	sug_nvr	vartyfd_5	muchfd_3	sugcfr_nvr	cleft_no	abmom_yes	ab_no	brsh_yes	brshagerng_4	brshfreq_1	tthbrsh_yes	tthpst_yes	tthpstTyp_chldF	rinse_spitrinse	thtpstamt_pea	NO	YES	YES
2028.1	2028	MCRI	78	6.5	F	DZ	sug_nvr	vartyfd_4	muchfd_3	sugcfr_nvr	cleft_no	abmom_dnr	ab_no	brsh_yes	brshagerng_2	brshfreq_1	tthbrsh_yes	tthpst_yes	tthpstTyp_chldF	rinse_spitrinse	thtpstamt_smr	NO	YES	YES
2028.2	2028	MCRI	78	6.5	F	DZ	sug_nvr	vartyfd_4	muchfd_3	sugcfr_nvr	cleft_no	abmom_dnr	ab_no	brsh_yes	brshagerng_2	brshfreq_1	tthbrsh_yes	tthpst_yes	tthpstTyp_chldF	rinse_spitrinse	thtpstamt_smr	NO	YES	YES
3006.2	3006	MCRI	80	6.7	M	DZ																YES	YES	YES
3042.1	3042	MCRI	78	6.5	F	MZ	sug_smt	vartyfd_3	muchfd_2	sugcfr_smt	cleft_no	abmom_dnr	ab_no	brsh_yes	brshagerng_2	brshfreq_2	tthbrsh_yes	tthpst_yes	tthpstTyp_adltF	rinse_spitrinse	thtpstamt_smr	NO	YES	YES
A-1504-96.A	A-1504-96	CBRG	66	5.5	F	MZ	sug_nvr	vartyfd_3	muchfd_3		cleft_no	abmom_yes	ab_no	brsh_yes	brshagerng_4	brshfreq_1	tthbrsh_yes	tthpst_yes	tthpstTyp_chldF	rinse_spit	thtpstamt_full	NO	YES	YES
A-1505-99.A	A-1505-99	CBRG	107	8.9	F	MZ	sug_nvr	vartyfd_3	muchfd_3		cleft_no	abmom_no	ab_no	brsh_yes	brshagerng_2	brshfreq_1	tthbrsh_yes	tthpst_yes	tthpstTyp_chldF	rinse_spit	thtpstamt_pea	NO	YES	YES
M-1506-106.A	M-1506-106	CBRG	106	8.8	F	MZ	sug_nvr	vartyfd_3	muchfd_4		cleft_no	abmom_no	ab_no	brsh_yes			tthbrsh_yes	tthpst_yes				YES	YES	YES
M-1507-118.A	M-1507-118	CBRG	118	9.8	M	DZ	sug_smt	vartyfd_5	muchfd_5		cleft_no	abmom_yes	ab_yes	brsh_yes	brshagerng_4	brshfreq_1	tthbrsh_yes	tthpst_yes	tthpstTyp_chldF	rinse_spitrinse	thtpstamt_pea	YES	YES	YES
M-1507-119.A	M-1507-119	CBRG	115	9.6	F	MZ	sug_smt	vartyfd_3	muchfd_3		cleft_no	abmom_no	ab_no	brsh_yes	brshagerng_2	brshfreq_2	tthbrsh_yes	tthpst_yes	tthpstTyp_adltF	rinse_spitrinse	thtpstamt_full	YES	YES	YES
M-1507-119.B	M-1507-119	CBRG	115	9.6	F	MZ	sug_smt	vartyfd_3	muchfd_3		cleft_no	abmom_no	ab_no	brsh_yes	brshagerng_2	brshfreq_2	tthbrsh_yes	tthpst_yes	tthpstTyp_adltF	rinse_spitrinse	thtpstamt_full	YES	YES	YES
M-1507-133.B	M-1507-133	CBRG	100	8.3	F	MZ	sug_nvr	vartyfd_4	muchfd_4		cleft_no	abmom_no	ab_no	brsh_yes	brshagerng_2	brshfreq_1	tthbrsh_yes	tthpst_yes		rinse_spitrinse	thtpstamt_pea	NO	YES	YES
M-1507-134.B	M-1507-134	CBRG	129	10.8	F	DZ	sug_nvr				cleft_no	abmom_no	ab_no	brsh_yes	brshagerng_3	brshfreq_2		tthpst_yes	tthpstTyp_chldF		thtpstamt_full	NO	YES	YES
M-1507-138.A	M-1507-138	CBRG	122	10.2	M	DZ								brsh_yes		brshfreq_2		tthpst_yes	tthpstTyp_chldF		thtpstamt_smr	YES	YES	YES
M-1507-147.B	M-1507-147	CBRG	110	9.2	M	DZ		vartyfd_4	muchfd_4		cleft_no	abmom_dnr	ab_no	brsh_yes	brshagerng_4	brshfreq_2	tthbrsh_yes	tthpst_yes	tthpstTyp_chldF	rinse_spitrinse	thtpstamt_full	YES	YES	YES
S-1409-53.B	S-1409-53	CBRG	98	8.2	M	DZ	sug_alw	vartyfd_1	muchfd_5		cleft_no	abmom_yes	ab_dnr	brsh_yes	brshagerng_3	brshfreq_2	tthbrsh_yes	tthpst_yes	tthpstTyp_chldF	rinse_spitrinse	thtpstamt_full	NO	YES	YES
S-1409-57.A	S-1409-57	CBRG	115	9.6	M	MZ	sug_nvr	vartyfd_3	muchfd_2		cleft_no	abmom_no	ab_no	brsh_yes	brshagerng_3	brshfreq_1	tthbrsh_yes	tthpst_yes	tthpstTyp_adltF	rinse_spit	thtpstamt_full	NO	YES	YES
S-1409-57.B	S-1409-57	CBRG	115	9.6	M	MZ	sug_nvr	vartyfd_3	muchfd_2		cleft_no	abmom_no	ab_no	brsh_yes	brshagerng_3	brshfreq_1	tthbrsh_yes	tthpst_yes	tthpstTyp_adltF	rinse_spit	thtpstamt_full	NO	YES	YES
S-1410-75.A	S-1410-75	CBRG	93	7.8	M	DZ	sug_nvr	vartyfd_3	muchfd_3		cleft_no	abmom_no	ab_no	brsh_yes		brshfreq_1	tthbrsh_yes	tthpst_no	tthpstTyp_chldF	rinse_spitrinse	thtpstamt_pea	NO	YES	YES
S-1410-75.B	S-1410-75	CBRG	93	7.8	F	DZ	sug_nvr	vartyfd_3	muchfd_3		cleft_no	abmom_no	ab_no	brsh_yes		brshfreq_2	tthbrsh_yes	tthpst_no	tthpstTyp_chldF	rinse_spitrinse	thtpstamt_pea	YES	YES	YES
S-1504-86.A	S-1504-86	CBRG	108	9	F	MZ	sug_nvr	vartyfd_2	muchfd_3		cleft_no	abmom_no	ab_no	brsh_yes		brshfreq_1	tthbrsh_yes	tthpst_yes	tthpstTyp_adltF	rinse_spitrinse	thtpstamt_pea	NO	YES	YES
